# Supplementary material for: In Vitro Propagation of XXY Undifferentiated Mouse Spermatogonia: Model for Fertility Preservation in Klinefelter Syndrome Patients
Source: MDPI journal article supplement (doi:10.3390/ijms23010173), 2021-12-24
Supplement: s1 [file s1]

**Supplementary Materials:**

**Table S1.** Log of Taqman primers used for PCR analysis in the study.

| <b>Taqman Primers</b> | <b>Catalog #</b> | <b>Lot #</b>    | <b>Length (base pairs)</b> |
|-----------------------|------------------|-----------------|----------------------------|
| STRA8-FAM             | Mm00486473_m1    | P151128-001B04  | 68                         |
| UCHL1-FAM             | Mm00495900_m1    | P160426-006A10  | 78                         |
| ZBTB16-FAM            | Mm01176868_m1    | P150501-008 A10 | 63                         |
| THY1-FAM              | Mm00493681_m1    | P160426-006 H06 | 68                         |
| CD9-FAM               | Mm00514275_g1    | P160812-007 H05 | 64                         |
| ITGA6-FAM             | Mm00434375_m1    | P160798-011 F01 | 88                         |
| ITGB1-FAM             | Mm01253230_m1    | P151125-007 A04 | 75                         |
| GATA4-FAM             | Mm00484689_m1    | P150717-009 B06 | 84                         |
| SOX9-FAM              | Mm00448840_m1    | P160719-007 A05 | 101                        |
| CYP19a1-FAM           | Mm00484049_m1    | P160527-000 G10 | 74                         |
| CYP11A1-FAM           | Mm00490735_m1    | P160809-007 A05 | 82                         |
| CD34-FAM              | Mm00519283_m1    | P160527-002 A05 | 61                         |
| ACTA2-FAM             | Mm01546133_m1    | P151120-005 B11 | 88                         |
| POLR2A-FAM            | Mm00839493_m1    | P150306-005 A03 | 85                         |
| POLR2A-VIC            | Mm00839502_m1    | P161025-099 H09 | 70                         |

**Table S2.** Log of Antibodies used for Immunohistochemistry and FACS in the study.

| <b>Antibody (dilution)</b>                | <b>Catalog #</b> | <b>Company</b> |
|-------------------------------------------|------------------|----------------|
| Anti-Mouse MHC I (H-2Db) FITC (1:20)      | #11-5999         | eBioscience    |
| Mouse IgG2a K Isotype FITC (1:20)         | #11-4724         | eBioscience    |
| Anti-Mouse CD9 PE (1:20)                  | #12-0091         | eBioscience    |
| Rat IgG2a K Isotype PE (1:20)             | #12-4321         | eBioscience    |
| Anti-Human/Mouse CD49f APC (1:20)         | #17-0495         | eBioscience    |
| Rat IgG2a K Isotype APC (1:20)            | #17-4321         | eBioscience    |
| Anti-Human/Mouse _PGP9.5 (UCHL1) (1:1000) | #7863-050        | Serotec        |
